# Supplementary material
Source: publisher site journal article supplement (https://www.spandidos-publications.com/6039/downloadSupplementary)
Supplement: Supplementary file 1 [file downloadSupplementary]

## Sheet: Table SIV
Table SIV. The co-expressed genes that are significantly associated with CYTH4 expression.
ID	Pearson's correlation coefficient	P-value	FDR (BH)
CYTH4	1	1e-34	1e-30
TNNI2	0.764232	2.13e-34	1.84e-30
CD300A	0.763314	2.84e-34	1.84e-30
ITGAL	0.753017	6.65e-33	3.23e-29
LSP1	0.736129	8.49e-31	3.3e-27
ARHGAP27	0.734705	1.26e-30	4.07e-27
C10orf105	0.731444	3.05e-30	8.48e-27
SIPA1	0.727379	9.07e-30	2.21e-26
HMHA1	0.724363	2.01e-29	4.13e-26
MAP3K14	0.724149	2.13e-29	4.13e-26
ARHGAP30	0.720376	5.66e-29	1e-25
LILRB1	0.7193	7.46e-29	1.21e-25
TNFRSF1B	0.718473	9.22e-29	1.38e-25
SH3BP1	0.710907	6.17e-28	8.57e-25
SH3TC1	0.70819	1.2e-27	1.56e-24
CUEDC1	0.703434	3.8e-27	4.62e-24
ARAP1	0.703065	4.15e-27	4.75e-24
SH3BP2	0.702676	4.55e-27	4.77e-24
TFEB	0.702579	4.66e-27	4.77e-24
PLXNB2	0.701059	6.69e-27	6.51e-24
LILRB2	0.700103	8.39e-27	7.77e-24
ARHGAP9	0.690219	8.27e-26	7.31e-23
FGD2	0.688767	1.15e-25	9.71e-23
LILRA1	0.687363	1.57e-25	1.28e-22
SLC15A3	0.685884	2.19e-25	1.7e-22
ITGB2	0.685595	2.34e-25	1.75e-22
CSK	0.685383	2.45e-25	1.76e-22
KIAA1949	0.683634	3.61e-25	2.51e-22
EHBP1L1	0.682996	4.16e-25	2.76e-22
PREX1	0.682891	4.25e-25	2.76e-22
SECTM1	0.676915	1.56e-24	9.8e-22
GPR132	0.676663	1.65e-24	1e-21
TGFB1	0.675976	1.91e-24	1.13e-21
RHBDF2	0.674765	2.48e-24	1.42e-21
LILRA6	0.669253	7.92e-24	4.4e-21
VAV1	0.668613	9.05e-24	4.89e-21
C21orf67	0.666111	1.52e-23	7.99e-21
MVP	0.665152	1.85e-23	9.16e-21
RELT	0.665145	1.85e-23	9.16e-21
C10orf54	0.665065	1.88e-23	9.16e-21
TM7SF3	-0.664897	1.95e-23	9.26e-21
ABI3	0.663508	2.59e-23	1.2e-20
FNDC3B	-0.659813	5.48e-23	2.48e-20
POU2F2	0.659575	5.75e-23	2.54e-20
SASH3	0.657656	8.45e-23	3.65e-20
SLC43A2	0.655046	1.42e-22	6e-20
ITGAX	0.651473	2.86e-22	1.18e-19
GNGT2	0.650506	3.46e-22	1.4e-19
MPEG1	0.649418	4.27e-22	1.69e-19
LARP1B	-0.648063	5.54e-22	2.15e-19
ITGB7	0.647966	5.65e-22	2.15e-19
LILRB4	0.647203	6.54e-22	2.42e-19
UNC119	0.64715	6.61e-22	2.42e-19
PTPN1	0.646828	7.03e-22	2.53e-19
IRF8	0.646582	7.37e-22	2.61e-19
ARHGAP4	0.645689	8.74e-22	3.04e-19
LILRB3	0.643115	1.42e-21	4.86e-19
TRAF3IP3	0.641668	1.87e-21	6.28e-19
FGR	0.640414	2.37e-21	7.81e-19
LFNG	0.639365	2.88e-21	9.34e-19
SH2D3C	0.638246	3.55e-21	1.13e-18
XPOT	-0.637598	4e-21	1.26e-18
CD300LB	0.635827	5.55e-21	1.71e-18
PLCB2	0.634574	6.98e-21	2.12e-18
LST1	0.634347	7.28e-21	2.18e-18
CCDC88B	0.634156	7.54e-21	2.22e-18
RHOBTB2	0.632994	9.32e-21	2.71e-18
TTYH3	0.632247	1.07e-20	3.05e-18
RGS14	0.631555	1.21e-20	3.41e-18
LRRC25	0.630663	1.42e-20	3.95e-18
PPM1M	0.629119	1.88e-20	5.15e-18
LILRA5	0.627414	2.55e-20	6.89e-18
CDH23	0.624998	3.92e-20	1.04e-17
LOC100129034	0.624773	4.08e-20	1.07e-17
FAM116B	0.624708	4.12e-20	1.07e-17
UNC93B1	0.623922	4.74e-20	1.21e-17
DTX4	0.623214	5.36e-20	1.35e-17
NANOS1	-0.621419	7.35e-20	1.83e-17
KCNMB1	0.621294	7.51e-20	1.85e-17
KIAA0513	0.619895	9.58e-20	2.33e-17
SRC	0.619194	1.08e-19	2.6e-17
PAK1	0.618895	1.14e-19	2.7e-17
ELF4	0.61854	1.21e-19	2.84e-17
SIX3	-0.617983	1.33e-19	3.09e-17
LILRA2	0.616528	1.71e-19	3.92e-17
LAT2	0.614902	2.26e-19	5.12e-17
MOBKL2A	0.613773	2.74e-19	6.06e-17
SLC8A1	0.613771	2.74e-19	6.06e-17
MYO1F	0.613024	3.12e-19	6.73e-17
TMEM87A	-0.613023	3.12e-19	6.73e-17
ARHGEF10L	0.612202	3.58e-19	7.65e-17
BMS1P5	-0.611917	3.76e-19	7.94e-17
THUMPD1	-0.611214	4.23e-19	8.85e-17
HTR7	0.610165	5.05e-19	1.04e-16
CD300E	0.608909	6.23e-19	1.27e-16
HSPA4L	-0.607493	7.88e-19	1.6e-16
RASSF5	0.606722	8.96e-19	1.78e-16
C12orf11	-0.606717	8.97e-19	1.78e-16
GPR133	0.606134	9.88e-19	1.94e-16
C19orf2	-0.605557	1.09e-18	2.11e-16
LAPTM5	0.605117	1.17e-18	2.25e-16
FMNL1	0.604101	1.38e-18	2.63e-16
AMICA1	0.603153	1.61e-18	3.05e-16
TNFAIP2	0.602984	1.66e-18	3.1e-16
ARHGEF1	0.60271	1.73e-18	3.21e-16
CALR	-0.602479	1.8e-18	3.3e-16
IL10RA	0.59995	2.72e-18	4.94e-16
NAPSB	0.599542	2.9e-18	5.23e-16
ADCY7	0.599043	3.15e-18	5.62e-16
NCF1	0.598898	3.22e-18	5.7e-16
VCL	0.597809	3.84e-18	6.73e-16
CXCL16	0.597722	3.89e-18	6.76e-16
OGDHL	-0.597152	4.27e-18	7.34e-16
CASP1	0.597019	4.36e-18	7.43e-16
OAS1	0.596877	4.46e-18	7.54e-16
CTSS	0.596676	4.6e-18	7.61e-16
EXTL2	-0.596657	4.62e-18	7.61e-16
KDM5B	-0.596649	4.62e-18	7.61e-16
FAM110A	0.596603	4.66e-18	7.61e-16
BIN2	0.596315	4.88e-18	7.9e-16
CARD16	0.59624	4.94e-18	7.93e-16
TRABD	0.595537	5.52e-18	8.8e-16
STIM2	0.59473	6.28e-18	9.93e-16
MS4A6A	0.594444	6.57e-18	1.03e-15
HDAC9	0.593933	7.13e-18	1.11e-15
COCH	-0.592563	8.85e-18	1.37e-15
CDC42EP3	0.592419	9.05e-18	1.39e-15
EIF3A	-0.591952	9.75e-18	1.48e-15
PDLIM2	0.591639	1.02e-17	1.54e-15
SPIN4	-0.591284	1.08e-17	1.62e-15
CYTH1	0.591052	1.12e-17	1.67e-15
PIK3R5	0.590712	1.18e-17	1.74e-15
C5orf33	-0.589969	1.33e-17	1.95e-15
MORF4L2	-0.588384	1.7e-17	2.47e-15
HCLS1	0.588296	1.73e-17	2.49e-15
PLD2	0.588252	1.74e-17	2.49e-15
MYCL1	0.587656	1.91e-17	2.71e-15
PLD4	0.587172	2.06e-17	2.9e-15
ZDHHC7	0.587049	2.1e-17	2.93e-15
HLA-DMA	0.586315	2.35e-17	3.26e-15
UGP2	-0.586257	2.37e-17	3.27e-15
AVEN	-0.586203	2.39e-17	3.27e-15
HIVEP3	0.58605	2.45e-17	3.33e-15
RCN1	-0.585938	2.49e-17	3.36e-15
RCN2	-0.585379	2.71e-17	3.64e-15
SLC12A4	0.585331	2.73e-17	3.64e-15
ACSM1	-0.585146	2.81e-17	3.72e-15
DHRS9	0.585067	2.84e-17	3.74e-15
ZDHHC9	-0.584645	3.04e-17	3.96e-15
STK10	0.584036	3.33e-17	4.32e-15
CLEC7A	0.583291	3.74e-17	4.81e-15
PPARD	0.583039	3.88e-17	4.97e-15
KCTD12	0.582952	3.93e-17	5e-15
STAR	-0.582251	4.38e-17	5.53e-15
LARP1	-0.582035	4.52e-17	5.67e-15
RAC2	0.581965	4.57e-17	5.67e-15
TLR7	0.581959	4.58e-17	5.67e-15
NEK6	0.581542	4.88e-17	6e-15
CD300LF	0.581196	5.14e-17	6.29e-15
H2AFV	-0.580044	6.12e-17	7.44e-15
C3orf33	-0.578422	7.81e-17	9.44e-15
TLR6	0.577407	9.1e-17	1.09e-14
USF1	0.577371	9.15e-17	1.09e-14
EFHD2	0.576675	1.02e-16	1.2e-14
CD37	0.576509	1.04e-16	1.23e-14
GPR35	0.576325	1.07e-16	1.25e-14
CD74	0.576008	1.12e-16	1.31e-14
IFI30	0.57509	1.29e-16	1.49e-14
ZNF429	-0.574125	1.48e-16	1.71e-14
AHNAK2	0.572671	1.84e-16	2.1e-14
TLR8	0.572099	2e-16	2.28e-14
ATP10A	0.570974	2.36e-16	2.66e-14
TRNT1	-0.570946	2.37e-16	2.66e-14
TSN	-0.570749	2.44e-16	2.73e-14
TMEM132A	0.570658	2.47e-16	2.75e-14
SLA	0.569297	3.02e-16	3.33e-14
TCIRG1	0.569242	3.04e-16	3.34e-14
ARRDC2	0.569132	3.09e-16	3.37e-14
CASP6	-0.569113	3.1e-16	3.37e-14
WAS	0.568983	3.16e-16	3.41e-14
SLC26A2	-0.568789	3.25e-16	3.49e-14
LGALS2	0.568688	3.3e-16	3.52e-14
CYTIP	0.568499	3.39e-16	3.6e-14
PRRC1	-0.568118	3.58e-16	3.78e-14
CCR5	0.568016	3.63e-16	3.82e-14
NCF1C	0.567524	3.9e-16	4.08e-14
CD86	0.567455	3.94e-16	4.1e-14
LOC653653	0.567254	4.06e-16	4.19e-14
MEF2D	0.567224	4.07e-16	4.19e-14
HLA-DMB	0.566601	4.46e-16	4.56e-14
MAP3K3	0.566288	4.67e-16	4.75e-14
PRPS2	-0.565463	5.25e-16	5.32e-14
C9orf91	0.565329	5.36e-16	5.4e-14
NCF1B	0.565231	5.43e-16	5.45e-14
CANX	-0.564908	5.69e-16	5.67e-14
AVPR2	0.564267	6.24e-16	6.19e-14
GIMAP1	0.564061	6.42e-16	6.34e-14
SH2B3	0.562729	7.77e-16	7.63e-14
ZNF138	-0.56251	8.02e-16	7.83e-14
MICAL1	0.56161	9.11e-16	8.86e-14
CHST15	0.561493	9.26e-16	8.96e-14
ZNF273	-0.561188	9.67e-16	9.31e-14
CD300C	0.561128	9.76e-16	9.32e-14
HLA-DRA	0.561111	9.78e-16	9.32e-14
NTNG2	-0.561051	9.86e-16	9.36e-14
AANAT	0.560671	1.04e-15	9.83e-14
POLD4	0.560341	1.09e-15	1.02e-13
MTFR1	-0.559889	1.16e-15	1.08e-13
GRK6	0.559183	1.28e-15	1.19e-13
GJC1	-0.558776	1.36e-15	1.25e-13
MYD88	0.55786	1.55e-15	1.42e-13
TNFRSF11A	0.556523	1.87e-15	1.7e-13
COTL1	0.556522	1.87e-15	1.7e-13
VNN2	0.556445	1.89e-15	1.71e-13
PWWP2B	0.555522	2.14e-15	1.93e-13
EPDR1	-0.555469	2.16e-15	1.93e-13
RGS19	0.555443	2.17e-15	1.93e-13
EPT1	-0.555054	2.29e-15	2.03e-13
MS4A4A	0.553182	2.97e-15	2.62e-13
HLA-DPA1	0.553059	3.02e-15	2.65e-13
AP1S2	0.552648	3.19e-15	2.8e-13
KCTD17	0.5521	3.44e-15	3e-13
PECAM1	0.551268	3.86e-15	3.35e-13
MLEC	-0.549575	4.86e-15	4.2e-13
ADAP2	0.549411	4.97e-15	4.28e-13
ZNF107	-0.549036	5.24e-15	4.49e-13
CSPP1	-0.548947	5.3e-15	4.52e-13
SLC12A9	0.548916	5.32e-15	4.52e-13
STAT6	0.548831	5.38e-15	4.55e-13
DOK2	0.548779	5.42e-15	4.56e-13
CLINT1	-0.54808	5.96e-15	5e-13
IFI35	0.548023	6.01e-15	5.01e-13
NCF2	0.547567	6.39e-15	5.31e-13
RPGRIP1L	-0.547457	6.49e-15	5.37e-13
CD14	0.547354	6.58e-15	5.42e-13
RAPGEF1	0.54726	6.66e-15	5.47e-13
CD1C	0.54658	7.31e-15	5.96e-13
FGF13	-0.546564	7.32e-15	5.96e-13
VNN1	0.546371	7.51e-15	6.09e-13
IRF7	0.545886	8.02e-15	6.47e-13
NCRNA00188	-0.545517	8.43e-15	6.78e-13
SLC16A3	0.545462	8.49e-15	6.8e-13
RENBP	0.5454	8.56e-15	6.83e-13
NLRP12	0.545252	8.74e-15	6.93e-13
C20orf118	0.544764	9.33e-15	7.37e-13
VDR	0.544693	9.42e-15	7.41e-13
MIB1	-0.544188	1.01e-14	7.88e-13
ZNF323	-0.544175	1.01e-14	7.88e-13
B3GALTL	-0.544107	1.02e-14	7.92e-13
LOC642826	-0.544043	1.03e-14	7.96e-13
RARG	0.543703	1.08e-14	8.29e-13
C12orf29	-0.54368	1.08e-14	8.29e-13
DAPP1	0.543622	1.09e-14	8.31e-13
ITGB6	-0.543593	1.09e-14	8.31e-13
NCOR2	0.543579	1.09e-14	8.31e-13
GBE1	-0.543033	1.18e-14	8.9e-13
ATP2C1	-0.542749	1.22e-14	9.21e-13
APOL3	0.541368	1.47e-14	1.1e-12
PIK3CB	-0.541074	1.53e-14	1.14e-12
UBXN11	0.540999	1.54e-14	1.15e-12
SLC7A7	0.540872	1.57e-14	1.16e-12
RGS9BP	-0.540267	1.7e-14	1.26e-12
FXYD6	0.540155	1.72e-14	1.27e-12
BCL3	0.539885	1.79e-14	1.31e-12
OAS2	0.539725	1.82e-14	1.33e-12
IQSEC1	0.539619	1.85e-14	1.35e-12
CLN8	0.539375	1.91e-14	1.38e-12
CRIP3	0.539365	1.91e-14	1.38e-12
ARHGAP17	0.539236	1.95e-14	1.4e-12
TICAM1	0.538073	2.27e-14	1.63e-12
CDK14	-0.538012	2.29e-14	1.63e-12
RNASE6	0.53792	2.31e-14	1.65e-12
ANAPC7	-0.537819	2.34e-14	1.66e-12
LOC158696	-0.537118	2.57e-14	1.81e-12
FAM53B	0.53711	2.57e-14	1.81e-12
PRKRA	-0.536611	2.75e-14	1.93e-12
KIAA0226	0.536399	2.82e-14	1.97e-12
PTPRG	-0.535796	3.05e-14	2.13e-12
CLEC4A	0.53578	3.06e-14	2.13e-12
RASL12	-0.535536	3.16e-14	2.19e-12
C17orf87	0.53533	3.25e-14	2.24e-12
MYO1G	0.534597	3.57e-14	2.45e-12
CX3CR1	0.534496	3.62e-14	2.48e-12
C3orf23	-0.534448	3.64e-14	2.48e-12
HLA-DRB1	0.533954	3.88e-14	2.64e-12
CHST7	0.533856	3.93e-14	2.66e-12
NOTCH2	0.533684	4.02e-14	2.71e-12
SLC4A3	0.533423	4.16e-14	2.8e-12
TRIM8	0.533261	4.24e-14	2.85e-12
LY96	0.533126	4.32e-14	2.88e-12
ITGAM	0.533119	4.32e-14	2.88e-12
HLA-DPB1	0.532627	4.61e-14	3.06e-12
GLIPR2	0.532195	4.87e-14	3.22e-12
PDE4DIP	0.532133	4.91e-14	3.23e-12
GMCL1	-0.532098	4.93e-14	3.23e-12
LOXL4	-0.532081	4.94e-14	3.23e-12
STRN3	-0.532065	4.95e-14	3.23e-12
RERE	0.531619	5.24e-14	3.41e-12
G6PD	0.531555	5.29e-14	3.43e-12
MAFB	0.53126	5.49e-14	3.55e-12
GALNT1	-0.531005	5.67e-14	3.65e-12
MYB	-0.530884	5.76e-14	3.7e-12
GLMN	-0.530863	5.78e-14	3.7e-12
COL2A1	-0.530538	6.02e-14	3.84e-12
HK3	0.530402	6.13e-14	3.9e-12
B4GALT1	0.530231	6.27e-14	3.96e-12
RAB7L1	0.530229	6.27e-14	3.96e-12
GPBAR1	0.530024	6.43e-14	4.05e-12
DUSP7	0.529854	6.57e-14	4.12e-12
SCCPDH	-0.529578	6.81e-14	4.26e-12
RNPEPL1	0.529389	6.98e-14	4.35e-12
HRH4	-0.529295	7.06e-14	4.39e-12
PEX3	-0.528875	7.45e-14	4.61e-12
SLC9A9	0.528731	7.59e-14	4.68e-12
RASA3	0.528603	7.71e-14	4.75e-12
VOPP1	0.52826	8.06e-14	4.94e-12
PSMB10	0.527819	8.52e-14	5.21e-12
CYTSB	0.527644	8.71e-14	5.3e-12
HTATIP2	0.527639	8.72e-14	5.3e-12
DNAL1	-0.5274	8.99e-14	5.44e-12
SEC14L1	0.527335	9.06e-14	5.47e-12
CACNB1	0.52686	9.62e-14	5.79e-12
FAM198A	-0.526211	1.04e-13	6.27e-12
MMP2	-0.525969	1.08e-13	6.44e-12
PDIA5	-0.525454	1.15e-13	6.85e-12
IL1RN	0.52538	1.16e-13	6.9e-12
TTC26	-0.52535	1.16e-13	6.9e-12
LCAT	0.524943	1.23e-13	7.24e-12
TLR1	0.524701	1.26e-13	7.44e-12
RAB24	0.524506	1.29e-13	7.61e-12
HORMAD1	0.523846	1.41e-13	8.24e-12
LRP1	0.523746	1.42e-13	8.32e-12
PMM1	0.523166	1.53e-13	8.92e-12
MED21	-0.522816	1.6e-13	9.29e-12
SAMHD1	0.522407	1.68e-13	9.74e-12
SH3BGRL3	0.522227	1.72e-13	9.94e-12
FBXW4	0.521861	1.8e-13	1.04e-11
CEACAM21	0.521835	1.81e-13	1.04e-11
ZNF77	-0.521774	1.82e-13	1.04e-11
ZNF498	-0.521548	1.87e-13	1.07e-11
HLA-DRB6	0.521189	1.96e-13	1.11e-11
ASTN1	-0.520911	2.03e-13	1.15e-11
ARSK	-0.520686	2.09e-13	1.18e-11
BCKDHB	-0.520537	2.12e-13	1.2e-11
TBC1D9	0.520461	2.14e-13	1.21e-11
MESDC2	-0.520348	2.17e-13	1.22e-11
S100A9	0.520319	2.18e-13	1.22e-11
C1orf38	0.520279	2.19e-13	1.22e-11
HSPA7	0.520158	2.23e-13	1.24e-11
CAP1	0.519996	2.27e-13	1.26e-11
NLRP3	0.51927	2.48e-13	1.37e-11
BLNK	0.519173	2.51e-13	1.39e-11
LMAN1	-0.51896	2.58e-13	1.42e-11
C19orf51	-0.518566	2.71e-13	1.48e-11
IRX5	-0.518558	2.71e-13	1.48e-11
PPM1J	0.518356	2.78e-13	1.51e-11
SELPLG	0.518268	2.81e-13	1.53e-11
PTPRO	0.518241	2.82e-13	1.53e-11
DEF6	0.517953	2.92e-13	1.58e-11
FGL2	0.517759	2.99e-13	1.61e-11
AIG1	-0.517669	3.03e-13	1.63e-11
FAM89B	0.517353	3.15e-13	1.68e-11
CD180	0.51723	3.19e-13	1.71e-11
SNX21	0.516809	3.36e-13	1.79e-11
TASP1	-0.516758	3.38e-13	1.8e-11
WDR49	0.516727	3.4e-13	1.8e-11
SRPRB	-0.516581	3.46e-13	1.83e-11
SULF2	0.516441	3.52e-13	1.85e-11
TEP1	0.516335	3.56e-13	1.87e-11
FGD4	0.516136	3.65e-13	1.91e-11
RBM47	0.515853	3.78e-13	1.98e-11
ABCA7	0.515789	3.81e-13	1.99e-11
ARRB2	0.515734	3.83e-13	1.99e-11
ITPR2	-0.515553	3.92e-13	2.03e-11
SIGLEC7	0.515449	3.97e-13	2.05e-11
CD1A	0.515342	4.02e-13	2.07e-11
FAM49A	0.515162	4.11e-13	2.11e-11
FAIM	-0.514831	4.28e-13	2.2e-11
TREX1	0.514732	4.33e-13	2.22e-11
MARK2	0.514559	4.42e-13	2.26e-11
C5AR1	0.514391	4.52e-13	2.3e-11
TTC30A	-0.514158	4.64e-13	2.36e-11
CHRNB1	-0.513775	4.87e-13	2.46e-11
MSR1	0.513674	4.93e-13	2.49e-11
EEF2K	-0.513373	5.11e-13	2.57e-11
ANKRD13A	0.513275	5.17e-13	2.6e-11
PHF17	-0.513197	5.22e-13	2.62e-11
CD1D	0.512998	5.35e-13	2.67e-11
SLC37A2	0.512601	5.61e-13	2.8e-11
LYN	0.512517	5.67e-13	2.82e-11
C19orf38	0.512392	5.75e-13	2.85e-11
FLNB	0.512315	5.81e-13	2.87e-11
POLR3G	-0.511911	6.09e-13	3.01e-11
PPP1R9B	0.511619	6.31e-13	3.11e-11
LGALS1	0.511497	6.41e-13	3.15e-11
SP110	0.51138	6.5e-13	3.18e-11
RNF166	0.51127	6.58e-13	3.22e-11
TBC1D22A	0.510941	6.85e-13	3.34e-11
PDPN	-0.510838	6.93e-13	3.37e-11
CASP5	0.510737	7.02e-13	3.4e-11
FERMT3	0.510511	7.21e-13	3.49e-11
PPM1H	-0.51041	7.3e-13	3.52e-11
MYH9	0.510382	7.32e-13	3.53e-11
PIK3AP1	0.510113	7.56e-13	3.63e-11
C15orf44	-0.510018	7.65e-13	3.67e-11
LTB4R	0.509875	7.78e-13	3.72e-11
C5orf20	0.509731	7.92e-13	3.77e-11
C1orf127	0.50944	8.2e-13	3.9e-11
LOC729603	0.509423	8.22e-13	3.9e-11
TRIM6	-0.509209	8.43e-13	3.99e-11
SIGLEC16	0.508259	9.44e-13	4.46e-11
ST14	0.507743	1e-12	4.73e-11
SSTR2	-0.50751	1.03e-12	4.84e-11
IRF5	0.507499	1.03e-12	4.84e-11
ITPKA	-0.507278	1.06e-12	4.96e-11
RAB5B	-0.507167	1.07e-12	5.01e-11
ZFYVE19	0.507132	1.08e-12	5.02e-11
KCNH3	0.507095	1.08e-12	5.03e-11
PKIB	0.506604	1.15e-12	5.32e-11
FGD3	0.506458	1.17e-12	5.4e-11
ZNF440	-0.505864	1.25e-12	5.78e-11
PRRT4	-0.50543	1.32e-12	6.07e-11
C14orf135	-0.505031	1.38e-12	6.35e-11
KIAA1586	-0.504814	1.42e-12	6.5e-11
METRNL	0.504666	1.44e-12	6.59e-11
IL12RB1	0.504537	1.47e-12	6.68e-11
MEFV	0.50417	1.53e-12	6.96e-11
PLEC	0.504143	1.54e-12	6.96e-11
CERCAM	-0.504062	1.55e-12	7.01e-11
NUCB2	-0.503978	1.57e-12	7.07e-11
DENND4B	0.503661	1.63e-12	7.32e-11
GPR153	-0.503497	1.66e-12	7.44e-11
KLF13	0.503246	1.71e-12	7.65e-11
FAM98A	-0.502816	1.79e-12	8e-11
BCL6	0.502523	1.86e-12	8.26e-11
AKAP13	0.50215	1.94e-12	8.61e-11
ZNF703	0.501781	2.02e-12	8.97e-11
ZNF629	-0.501695	2.05e-12	9.04e-11
SYK	0.501674	2.05e-12	9.04e-11
ENG	0.501313	2.14e-12	9.41e-11
ACSM3	-0.501295	2.14e-12	9.41e-11
PTPN6	0.501232	2.16e-12	9.46e-11
IGF2R	0.501082	2.2e-12	9.6e-11
NADK	0.501	2.22e-12	9.67e-11
P2RY13	0.500886	2.25e-12	9.78e-11
MFSD7	0.500779	2.28e-12	9.88e-11
TLR5	0.500496	2.35e-12	1.02e-10
WDR31	-0.500421	2.37e-12	1.02e-10
UXS1	-0.500411	2.37e-12	1.02e-10
SIGLEC11	0.500071	2.47e-12	1.06e-10
ELANE	-0.500005	2.49e-12	1.07e-10
CYTH4, cytohesin 4; FDR, False discovery rate; BH, Benjamini-Hochberg.
